# Supplementary material
Source: PubMed Central journal article supplement (PMC2713104)
Supplement: NIHMS101840-supplement-1_si_001.pdf [file NIHMS101840-supplement-1_si_001.pdf]

**Supplementary Information for “Multiplexed DNA detection using spectrally encoded porous SiO<sub>2</sub> photonic crystal particles,” Shawn O. Meade, Michelle Y. Chen, Michael J. Sailor, and Gordon M. Miskelly**

|                                                                               | 0 eroded | 1 eroded | 2 eroded | 3 eroded |
|-------------------------------------------------------------------------------|----------|----------|----------|----------|
| Net total                                                                     | 7832     | 6455     | 5180     | 4364     |
| 101011                                                                        | 1544     | 1457     | 1278     | 1125     |
| 110101                                                                        | 1701     | 1637     | 1474     | 1309     |
| 111111                                                                        | 1702     | 1619     | 1462     | 1338     |
| Invalid                                                                       | 2885     | 1742     | 966      | 592      |
| % classified                                                                  | 63.2     | 73.0     | 81.4     | 86.4     |
| No. of 101011 pixels with 680 nm fluorescence lower than highest 110101 pixel | 38       | 9        | 1        | 0        |

**Table S1** Summary of the classification results after differing amounts of erosion of the microparticle images. Net total excludes pixels associated with the irregular object near the center of the images in Figure 4. The % classified is the number placed in the correct class relative to the net total of pixels.

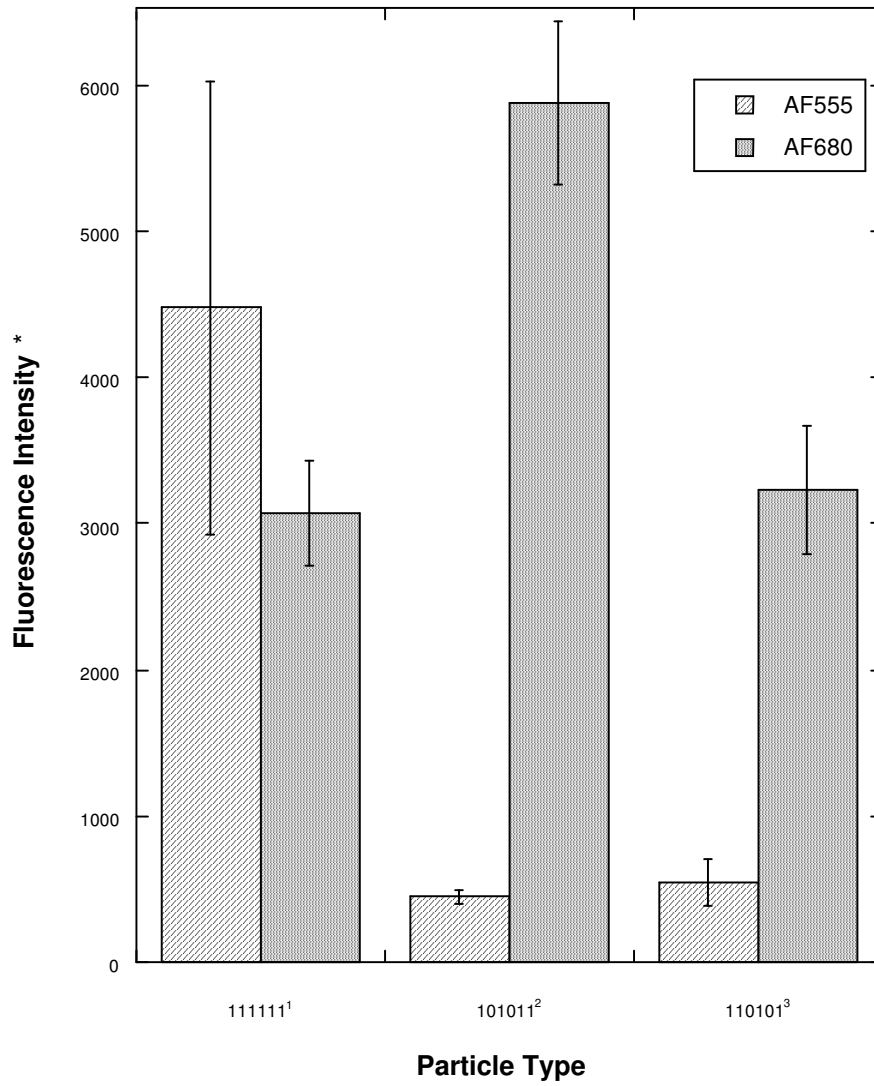

**Figure S1** Bar graph showing the mean pixel intensities for each fluorescence channel for each spectral code. \*14-bit scale, maximum value 16383

<sup>1</sup>Calculated based on 1619 pixels.

<sup>2</sup>Calculated based on 1457 pixels.

<sup>3</sup>Calculated based on 1637 pixels.
